# Supplementary material
Source: PubMed Central journal article supplement (PMC1383631)

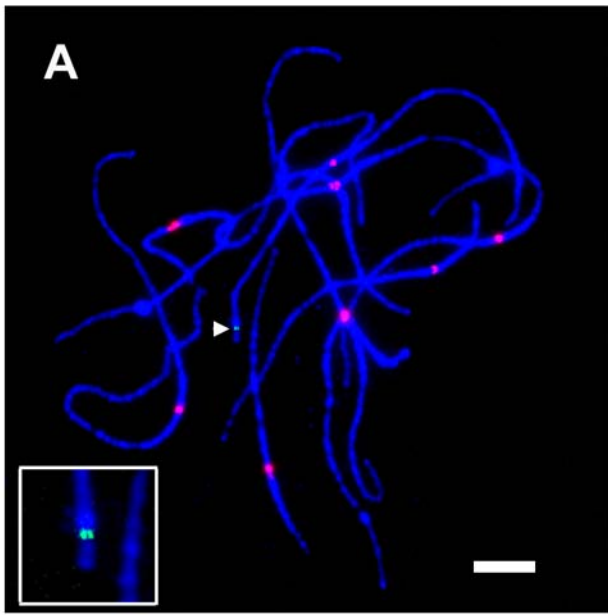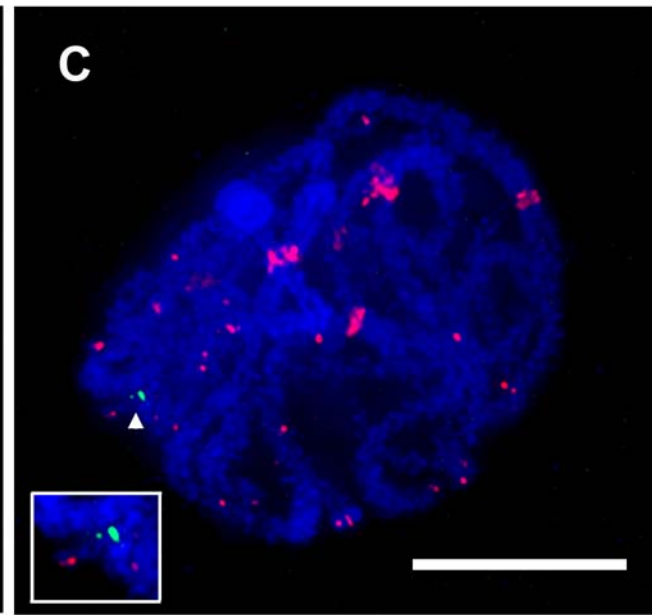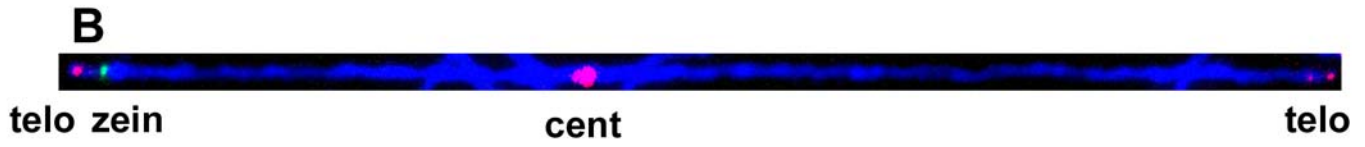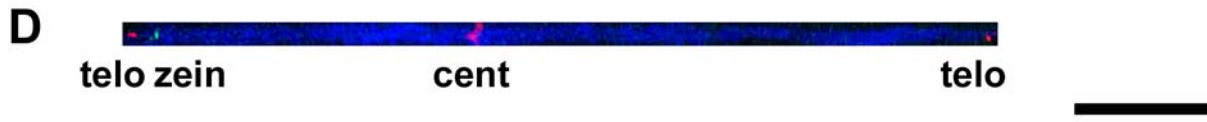

Supplement: plntcell_tpc.105.037838_2.pdf [file plntcell_tpc.105.037838_2.pdf]
